# Supplementary material for: A Comparison of p53 Isoform Profiles and Apoptosis Induced by Camptothecin or a Herbal Khat Extract (Catha Edulis (Vahl) Forssk. ex Endl.) in Leukemic Cell Lines: Exploring Cellular Responses in Therapy Development
Source: PubMed Central journal article supplement (PMC7760143; doi:10.3390/cancers12123596), 2020-12-01
Supplement: cancers-12-03596-s001.pdf [file cancers-12-03596-s001.pdf]

Supplementary Materials

# A Comparison of p53 Isoform Profiles and Apoptosis Induced by Camptothecin or a Herbal Khat Extract (*Catha Edulis* (Vahl) Forssk. ex Endl.) in Leukemic Cell Lines: Exploring Cellular Responses in Therapy Development

Therese Bredholt Onyango, Sigrun M. Hjelle, Ingvild Haaland, Olav K. Vintermyr, Anne C. Johannessen and Bjørn T. Gjertsen

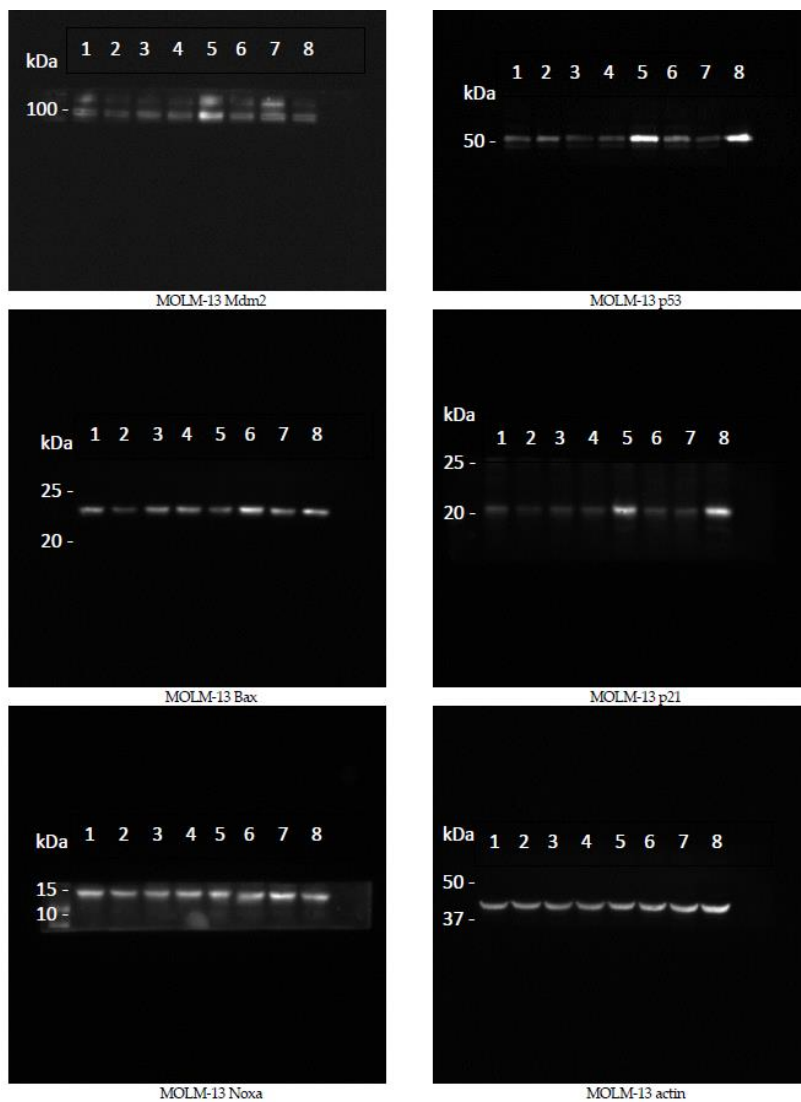

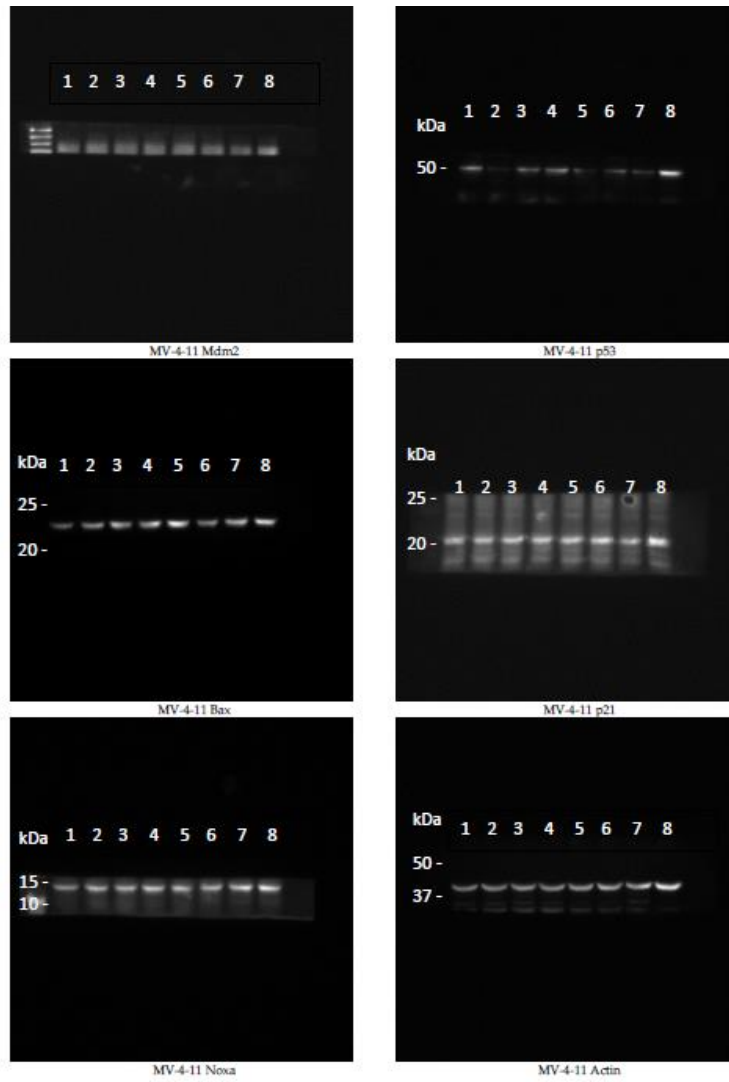

Figure S1. Western blot images in Figure 1C.

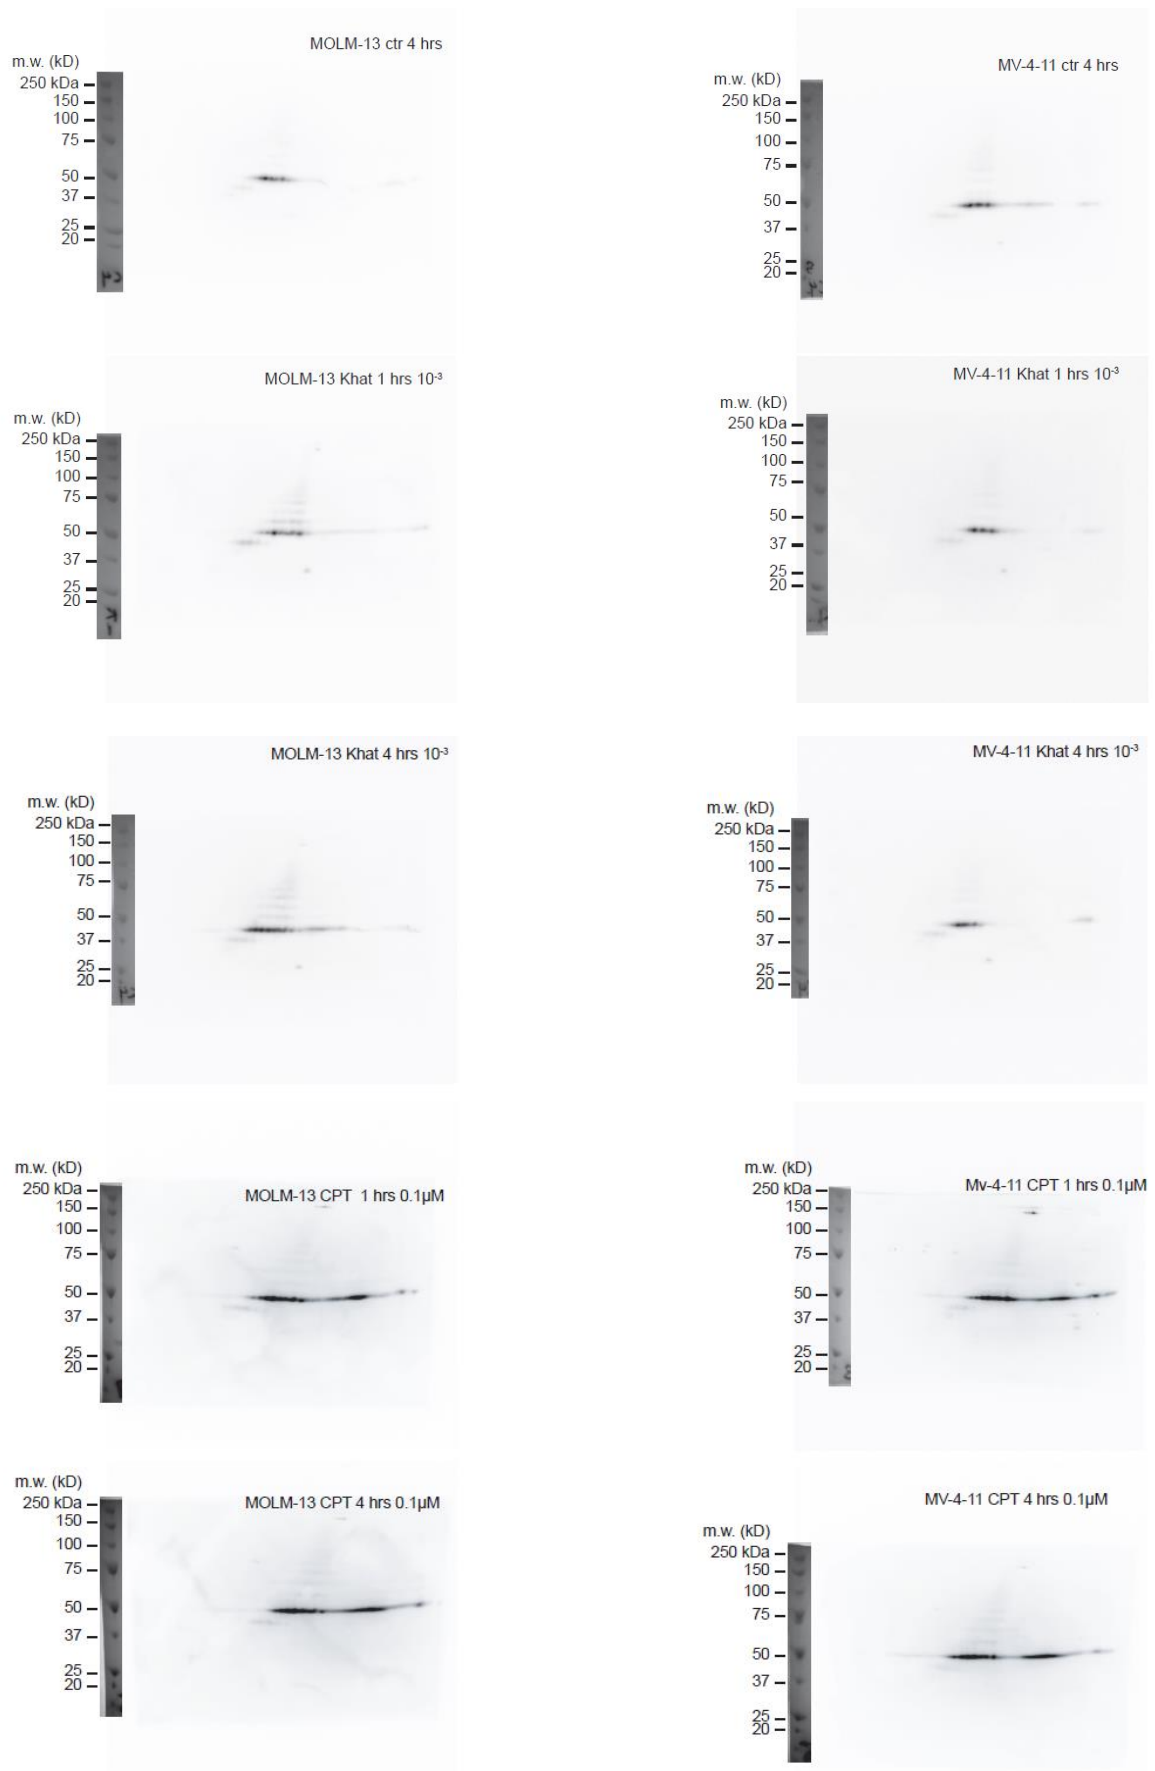

Figure S2. Original figures of Figure 2A.

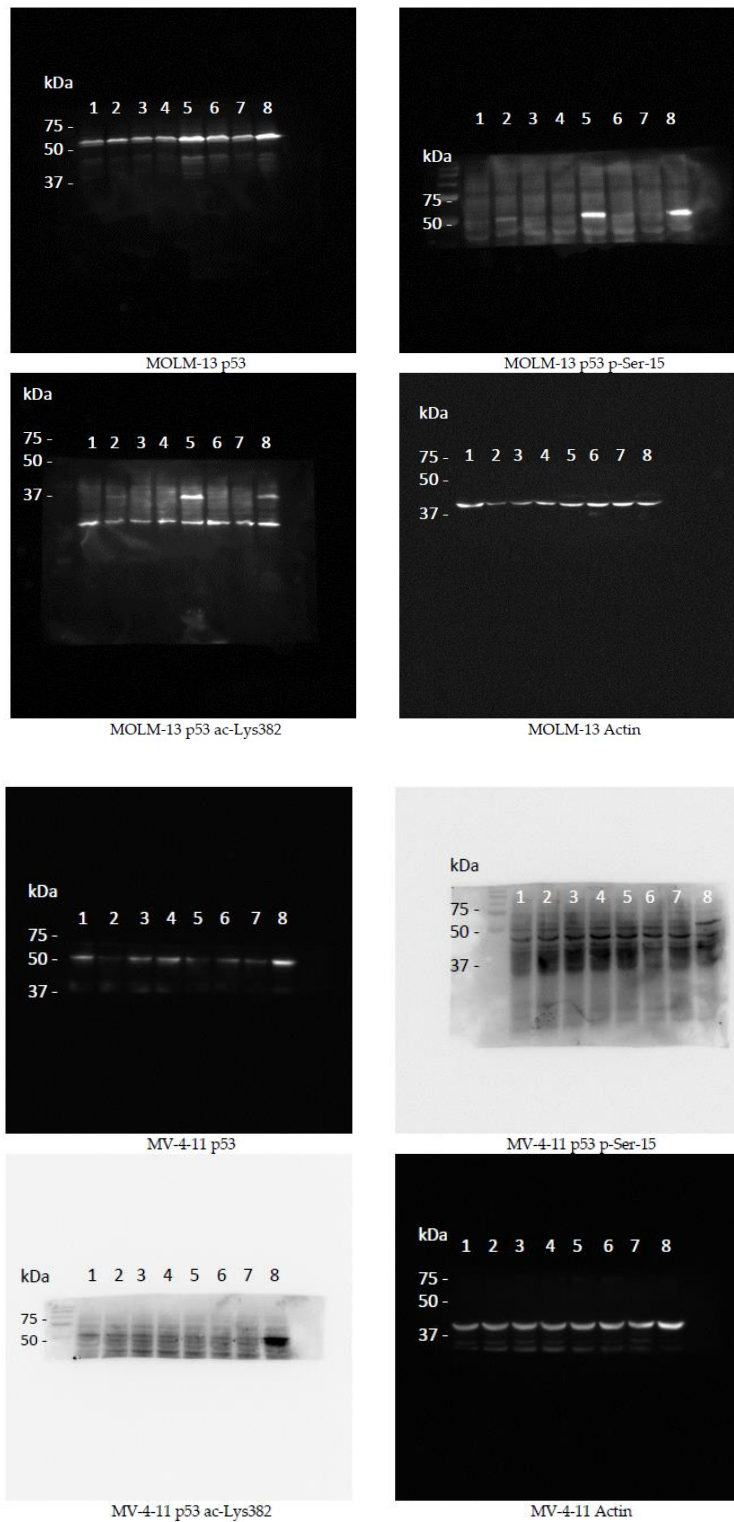

**Figure S3.** Western blot images in Figure 3A.

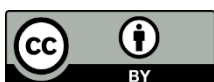

© 2020 by the authors. Licensee MDPI, Basel, Switzerland. This article is an open access article distributed under the terms and conditions of the Creative Commons Attribution (CC BY) license (<http://creativecommons.org/licenses/by/4.0/>).
